# Supplementary material
Source: MDPI journal article supplement (https://www.mdpi.com/2077-0472/11/10/1007)
Supplement: s1 [file s1]

Archive with 2 entries (2 files):
- Suppementary S1. Questionnaire survey.pdf
- Supplementary S2 - Protocol for Participatory Cost-benefit Analysis; Outline Notes for a Method..pdf
