# Supplementary material
Source: MDPI journal article supplement (https://www.mdpi.com/2077-0472/11/10/1007)
Supplement: s1 [file s1]

## Supplementary S1: Questionnaire Survey

Hello all. My name is Angela Mkindi. I thank you very much for spending your time to meet up with me. I am a researcher from the Nelson Mandela African Institution of Science and Technology-Arusha. I am aiming at facilitating a farmer research Network to assess use of botanicals for pest management. I realize and have witnessed your involvement in the project. I wish to ask questions about pests, and management, as well as about use of botanicals in the past seasons. I will hardly spend one hour in this activity. This information will assist to figure out sustainable and inclusive strategies for pest management for smallholder farmers.

---

**Name of Enumerator**

---

**Day and time**

yyyy-mm-dd

---

hh:mm

---

**Would you wish to take part in this survey?**

☐ Yes

☐ No

**What is your name?**

---

**How old are you**

---

**Sex**

☐ Male

☐ Female

**Which education level do you have?**

☐ Did not go to school

☐ Primary school (class 4)

☐ Primary school (class Seven)

☐ Secondary School

☐ Certificate

☐ Diploma

☐ First Degree

☐

Second degree

☐ Others?

**What other education do you have**

---

**Who do you live with in the family**

*Ask family composition. parents, children, and other relatives*

- ☐ Father
- ☐ Mother
- ☐ Girl child
- ☐ Boy child
- ☐ adopted
- ☐ other relatives
- ☐ non-relatives

**Father**

**Mother** \_\_\_\_\_

**Girl child** \_\_\_\_\_

**Boy child** \_\_\_\_\_

**adopted child** \_\_\_\_\_

**other relative** \_\_\_\_\_

**non-relative** \_\_\_\_\_

**Is this your permenent Sattlement?**

- ☐ Yes
- ☐ No

**Where else do you have a family?**

---

**What is your main daily activity**

- ☐ Farmer
- ☐ Employed
- ☐ Laborer
- ☐ Business
- ☐ Retired

**In which group do you belong?**

- ☐ Lukundane
- ☐ Nguvu kazi
- ☐ Kilimo bora
- ☐ Inuka

**What is the area of your cultivated field**

---

**In which zone is your field**

- ☐ Upper
- ☐ Middle
- ☐ Lower

**What is the type of vegetation around your field?**

- ☐ No vegetation
- ☐ Little/scattered vegetation
- ☐ There is a forest
- ☐ Field bordered by farms with similar crops
- ☐ Field bordered by farms with different crops

**What type of farming do you adopt**

- ☐ Monocrop
- ☐ Intercrop

**Name crops you have in your field**

---

**Farm ownership?**

- ☐ rented
- ☐ Family farm
- ☐ Bought
- ☐ Any other type of ownership

**Any other type of ownnership**

---

**Distance from your household to the field**

---

**Do you get and advice on extension officers?**

- ☐ Yes
- ☐ No

**If Yes, What kind of advise does he give you?**

- ☐ Use of chemical pesticides
- ☐ Use of natural methods
- ☐ Other advise

**What advice do you get**

---

**Have you encountered pests challenges in your field in the past two seasons?**

- ☐ Yes
- ☐ No
- ☐ I dont know

**If Yes, What insects are more challenging on your field?**

- ☐ Aphids
- ☐ Lady bird beetle
- ☐ Fall armyworm
- ☐ Pod sucker
- ☐ foliage beetle
- ☐ flower beetle

**What other insects have you seen in the field?**

- ☐ Lacering
- ☐ Ladybird beetle
- ☐ Hoverfly
- ☐ Robberfly
- ☐ Ladybird beetle larva
- ☐ Lacewing larva

**Can you recall the area of the field damaged by pests?**

- ☐ Quarter of an acre
- ☐ Half of an acre
- ☐ more than quarter
- ☐ I cant say exactly how much

**What are you using to control insect pests?**

- ☐ Chanical pesticides
- ☐ Botanical pesticides
- ☐ I use both pesticides and chemicals
- ☐ I use biological control options
- ☐ Others?

**If others, please mention other interventions.**

---

**What plant do you use as botanical pesticide?**

- ☐ Tephrosia vogelii
- ☐ Tithonia diversifolia
- ☐ Lantana camara
